# Supplementary material for: Amphiphilic functional block copolymers bearing a reactive furfuryl group via RAFT polymerization; reversible core cross-linked micelles via a Diels–Alder “click reaction”
Source: Royal Society of Chemistry journal article supplement (doi:10.1039/c5ra22476d), 2015-12-21
Supplement: c5ra22476d1.pdf [file c5ra22476d1.pdf]

# Amphiphilic Functional Block Copolymer Bearing Reactive Furfuryl Group via RAFT Polymerization; Reversible Core Cross-linked Micelles via Diels- Alder “Click Reaction”

Nabendu B Pramanik, Nikhil K Singha\*

Indian Institute of Technology Kharagpur, Rubber Technology Centre, Kharagpur- 721302,  
West Bengal, India

\*Corresponding Author E-mail: [nks@rtc.iitkgp.ernet.in](mailto:nks@rtc.iitkgp.ernet.in) (N. K. Singha)

Tel.: +91 3222 283178, Fax: +91 3222 255303.

## Supporting Information

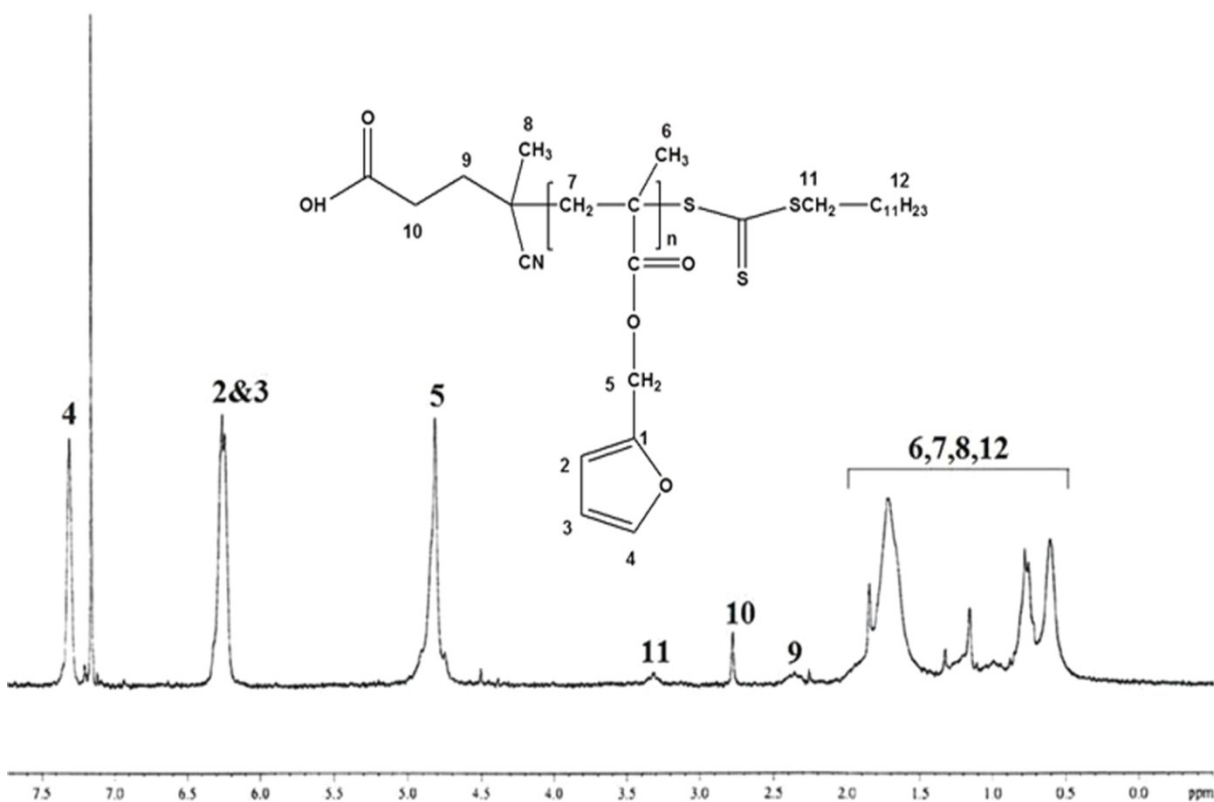

**Figure S1.** <sup>1</sup>H-NMR spectrum of PFMA prepared via RAFT polymerization.

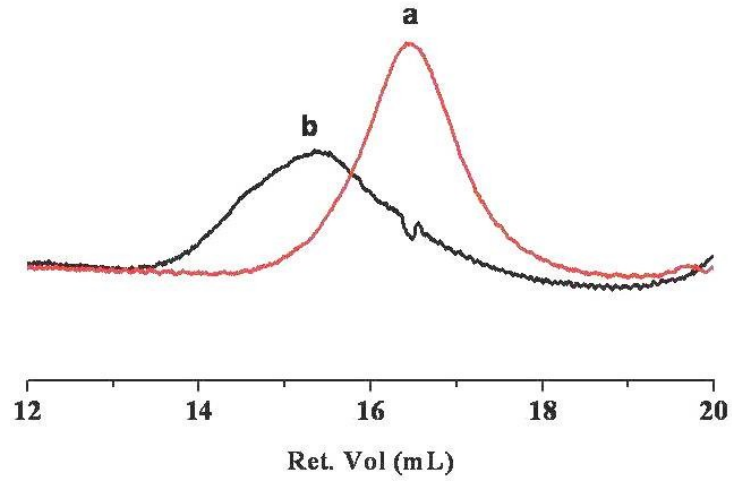

**Figure S2.** GPC traces of (a) PFMA-macro RAFT and (b) diblock copolymer PFP2.

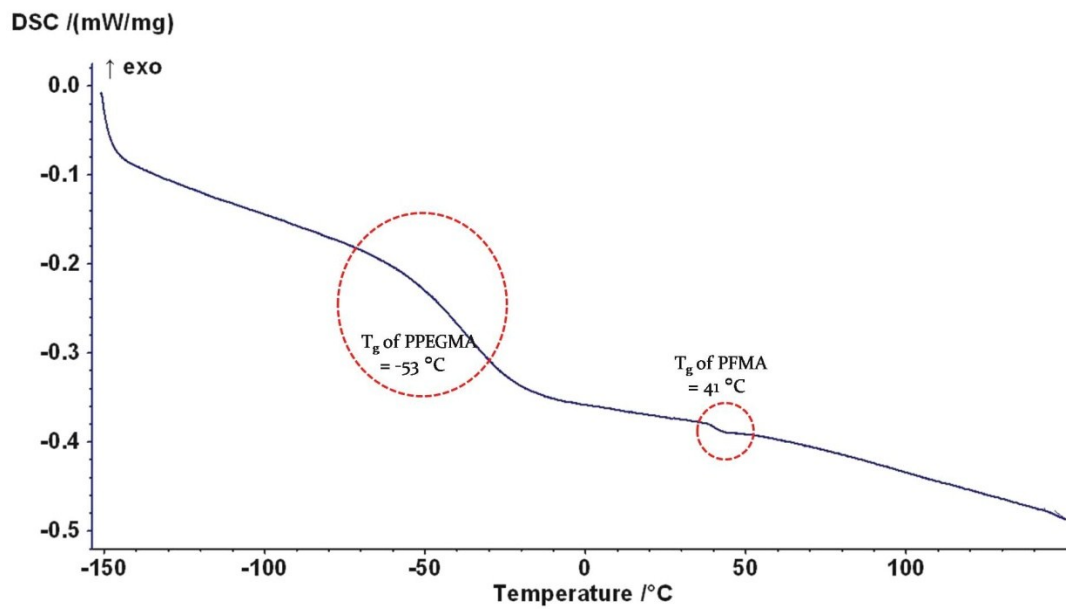

**Figure S3.** DSC thermogram of diblock copolymer PFP2.
